# Supplementary material
Source: PubMed Central journal article supplement (PMC3760148)
Supplement: NIHMS499765-supplement-02.pdf [file NIHMS499765-supplement-02.pdf]

**Table S2. Granule Phenotypes of Screen Hits, Related to Figure 1**

| Phenotypes                                      | Strong                                                                                                                         | Moderate                                                                                                                                                | Weak                                                                                                                                                                                                                                                                        |
|-------------------------------------------------|--------------------------------------------------------------------------------------------------------------------------------|---------------------------------------------------------------------------------------------------------------------------------------------------------|-----------------------------------------------------------------------------------------------------------------------------------------------------------------------------------------------------------------------------------------------------------------------------|
| <b>Stress granules:<br/>P-body co-localized</b> | <i>ATG11, CHO2, ERG2, INO2, ISW1, KCS1, PGD1, RLF2, RTC2, SHE10, SSH1, TGS1, VMA11, VMA16, VMA2, VMA3, VMA4, XRN1, YBR225W</i> | <i>ADO1, ASH1, ATG8*, CDC73, CIN8, GCN5, KTR1, MDS3, MRPL22, MTM1, NSG2, PFK2, RIM15, RPL42A, SWD3, TAT2, VHS2, VMA21, YIP3, YMD8, YMR262W, YNL200C</i> | <i>AAT1, ATC1, ATG18, BCK1, CDH1, CMK1, ERP5, SIR2, GSH2, HST1, ICE2, IKI3, IRC14, MON1, NFT1, NRM1, PCL1, PGC1, PHO86, PRE9, PSD1, RIM21, RNH70, RPL39, SET2, SDL1, SQS1, STO1, STE3, SWC5, SWH1, TRM12, UBX2, WSS1, YIL024C, YJR115W, YLR050C, YMR259C, YPL205C, ZWF1</i> |
| <b>Stress granules:<br/>P-body distinct</b>     | <i>HPR1*, MFT1*, THO2*, THP1*, THP2*</i>                                                                                       | <i>EOS1, EST1, HEL2, SAC3*, YLR169W</i>                                                                                                                 | <i>GGA1, LAT1, LSM6, MEH1, PAP2, POC4, SAM37, SWR1, YDL124W, YLR236C</i>                                                                                                                                                                                                    |
| <b>P-bodies increased</b>                       | <i>KCS1, PGD1, RPL42A, SWD3, SWH1, TAT2, XRN1</i>                                                                              | <i>ADO1, ASH1, CMK1, ERG2, HEL2, HST1, KTR1, NSG2, PCL9, PHO86, RLF2, RPL35B, SDL1, VHS2, YBR225W, YMD8</i>                                             | <i>ATC1, ERP5, MDS3, MFT1*, PFK2, RPL39, SHE10, STO1, YIL001W, YLR050C, YLR169W, YOR338W, YNL200C, ZWF1</i>                                                                                                                                                                 |
| <b>P-bodies decreased</b>                       | <i>BIO4, MLP1, PFD1, RPS28B, SAM37, TCM62, TIF3, VMS1, YMR086W, YSW1</i>                                                       | <i>EDC2, GGA1, GIM4, PAP2, YSW1</i>                                                                                                                     | <i>EGD1, GSP2, GIM5, HNT3, MSN5, SRO9, STE5, YIL014C-A</i>                                                                                                                                                                                                                  |
| <b>Intra-vacuolar accumulation</b>              | <i>ATG15</i>                                                                                                                   |                                                                                                                                                         |                                                                                                                                                                                                                                                                             |

Several gene deletions were quantified as hits in more than one category, hence duplicate entries above. In addition, \*-marked gene deletions exhibited protein mis-localization phenotypes as follows: Nuclear/nuclear peripheral accumulation of Pab1-GFP: *HPR1, MFT1, THO2, THP1, THP2, SAC3*.

**Table S4. Experimental Quantitation, Related to Figures 2, 3, and 4**

| <b>Midlog Cdc48/Ufd1/Npl4 ts alleles (Fig 2B)</b>                 |                                                                     |                                                                 |
|-------------------------------------------------------------------|---------------------------------------------------------------------|-----------------------------------------------------------------|
| <b>Strain/conditions</b>                                          | <b>Stress granule size (<math>\mu\text{m}_2</math> +/- st dev.)</b> | <b>Stress granule foci/cell (+/- st. dev.)</b>                  |
| WT (W303)                                                         | 0.11 +/- 0.07                                                       | 0.02 +/- 0.03                                                   |
| WT - 39°C 1hr                                                     | 0.20 +/- 0.03                                                       | 0.46 +/- 0.16                                                   |
| Cdc48-3                                                           | 0.14 +/- 0.07                                                       | 0.05 +/- 0.02                                                   |
| Cdc48-3 - 39°C 1hr                                                | 0.35 +/- 0.09                                                       | 2.03 +/- 1.13                                                   |
| Npl4-1                                                            | 0.18 +/- 0.13                                                       | 0.06 +/- 0.05                                                   |
| Npl4-1 - 39°C 1hr                                                 | 0.31 +/- 0.04                                                       | 0.91 +/- 0.29                                                   |
| Ufd1-2                                                            | 0.07 +/- 0.03                                                       | 0.02 +/- 0.02                                                   |
| Ufd1-2 - 39°C 1hr                                                 | 0.26 +/- 0.00                                                       | 0.99 +/- 0.40                                                   |
|                                                                   |                                                                     |                                                                 |
| <b>Stationary phase IVC quantitation (Fig 3 and 4)</b>            |                                                                     |                                                                 |
| <b>Strain/conditions</b>                                          | <b>Cells with Pab1-GFP IVCs (% +/- st. dev.)</b>                    | <b>Significance (2-tailed T-test) relative to <i>atg15Δ</i></b> |
| <i>atg15Δ</i> (BY background)                                     | 54.79 +/- 13.35                                                     |                                                                 |
| <i>atg8Δ atg15Δ</i>                                               | 22.74 +/- 6.28                                                      | 0.011                                                           |
| <i>atg11Δ atg15Δ</i>                                              | 9.47 +/- 7.18                                                       | 0.0025                                                          |
| <i>mon1Δ atg15Δ</i>                                               | 1.06 +/- 0.73                                                       | 6.1x10 <sup>-4</sup>                                            |
|                                                                   |                                                                     |                                                                 |
| <i>atg15Δ</i> (W303 background) - 27°C                            | 48.25 +/- 4.78                                                      |                                                                 |
| <i>atg15Δ</i> - 34°C 1hr                                          | 58.56 +/- 1.81                                                      |                                                                 |
| <i>atg15Δ</i> - 34°C 2hr                                          | 58.64 +/- 5.73                                                      |                                                                 |
| <i>cdc48-3 atg15Δ</i> - 27°C                                      | 33.82 +/- 1.28                                                      | 0.007 (27°C)                                                    |
| <i>cdc48-3 atg15Δ</i> - 34°C 1hr                                  | 23.08 +/- 3.53                                                      | 9.6x10 <sup>-5</sup> (34°C 1hr)                                 |
| <i>cdc48-3 atg15Δ</i> - 34°C 2hr                                  | 11.00 +/- 1.79                                                      | 1.6x10 <sup>-4</sup> (34°C 2hr)                                 |
|                                                                   |                                                                     |                                                                 |
| <i>atg15Δ</i> (RP840 background)                                  | 33.08 +/- 9.75                                                      |                                                                 |
| <i>atg15Δ</i> (RP840 background) - 37°C 1hr                       | 37.93 +/- 11.92                                                     |                                                                 |
| <i>dcp2-7 atg15Δ</i>                                              | 59.26 +/- 3.93                                                      | 8.5x10 <sup>-5</sup>                                            |
| <i>dcp2-7 atg15Δ</i> - 37°C 1hr                                   | 70.02 +/- 7.94                                                      | 8.5x10 <sup>-5</sup>                                            |
| <i>xrn1Δ atg15Δ</i>                                               | 69.46 +/- 8.44                                                      | 8.6x10 <sup>-4</sup>                                            |
|                                                                   |                                                                     |                                                                 |
| <b>Atg19/11-GFP co-localization (Figure S5)</b>                   |                                                                     |                                                                 |
|                                                                   | <b>Cells with Edc3-mCh foci overlap (% +/- st. dev)</b>             |                                                                 |
| Atg11-GFP (BY background, early stationary phase)                 | 5.64 +/- 0.73                                                       |                                                                 |
| Atg19-GFP (BY background, early stationary phase)                 | 5.99 +/- 1.49                                                       |                                                                 |
|                                                                   |                                                                     |                                                                 |
|                                                                   | <b>Cells with Pub1-mCh foci overlap (% +/- st. dev)</b>             |                                                                 |
|                                                                   |                                                                     |                                                                 |
| <b>GFP-Atg19 co-localization (Figure S6)</b>                      |                                                                     |                                                                 |
|                                                                   | <b>Cells with Pub1-mCh/GFP-Atg19 IVC overlap</b>                    |                                                                 |
| GFP-Atg19 - <i>mon1Δ</i> (BY background, early stationary phase)  | 7.6 +/- 2.42                                                        |                                                                 |
| GFP-Atg19 - <i>mon1Δ</i> (BY background, early stationary phase)  | 16.03 +/- 3.69                                                      |                                                                 |
|                                                                   |                                                                     |                                                                 |
| GFP-Atg19 - <i>atg15Δ</i> (BY background, early stationary phase) | 71.19 +/- 6.85                                                      |                                                                 |
|                                                                   |                                                                     |                                                                 |
| <b>HeLa Cell quantitation (Figure S7)</b>                         |                                                                     |                                                                 |
|                                                                   | <b>Cells with SGs (% +/- st. dev.)</b>                              | <b>Cells with PBs (% +/- st. dev)</b>                           |
| Unstressed                                                        | 0.00 +/- 0                                                          | 38.70 +/- 7.60                                                  |
| Arsenite 1mM - 1hr                                                | 100 +/- 0                                                           | 90.31 +/- 6.28                                                  |
| Bafilomycin A1 0.5 $\mu\text{M}$ - 1hr                            | 12.18 +/- 6.35                                                      | 30.98 +/- 11.18                                                 |
|                                                                   |                                                                     |                                                                 |
| Arsenite 1mM - 20 min recovery                                    | 98.24 +/- 2.14                                                      | 95.83 +/- 8.33                                                  |
| Arsenite 1mM - 1hr recovery                                       | 96.95 +/- 2.83                                                      | 96.90 +/- 5.37                                                  |
| Arsenite 1mM - 2hr recovery                                       | 68.79 +/- 18.52                                                     | 85.48 +/- 11.67                                                 |
| Arsenite 1mM - 3hr recovery                                       | 11.13 +/- 9.11                                                      | 65.93 +/- 23.11                                                 |
| Arsenite 1mM - 3-MA (10 $\mu\text{M}$ ) 20 min recovery           | 92.39 +/- 9.75                                                      | 82.95 +/- 29.54                                                 |
| Arsenite 1mM - 3-MA (10 $\mu\text{M}$ ) 1hr recovery              | 73.60 +/- 11.81                                                     | 71.85 +/- 25.95                                                 |
| Arsenite 1mM - 3-MA (10 $\mu\text{M}$ ) 2hr recovery              | 36.08 +/- 15.17                                                     | 84.79 +/- 5.24                                                  |
| Arsenite 1mM - 3-MA (10 $\mu\text{M}$ ) 3hr recovery              | 4.84 +/- 5.31                                                       | 61.01 +/- 22.19                                                 |
| Arsenite 1mM - Rapamycin (10nM) 20 min recovery                   | 84.01 +/- 0.96                                                      | 70.03 +/- 10.64                                                 |
| Arsenite 1mM - Rapamycin (10nM) 1hr recovery                      | 71.15 +/- 19.42                                                     | 57.18 +/- 10.15                                                 |
| Arsenite 1mM - Rapamycin (10nM) 2hr recovery                      | 73.05 +/- 4.93                                                      | 60.85 +/- 9.19                                                  |
| Arsenite 1mM - Rapamycin (10nM) 3hr recovery                      | 4.55 +/- 4.66                                                       | 48.82 +/- 44.09                                                 |
| Arsenite 1mM - Wortmannin (1.5 $\mu\text{M}$ ) 20 min recovery    | 100 +/- 0                                                           | 97.56 +/- 6.35                                                  |
| Arsenite 1mM - Wortmannin (1.5 $\mu\text{M}$ ) 1hr recovery       | 97.56 +/- 3.45                                                      | 97.56 +/- 3.45                                                  |
| Arsenite 1mM - Wortmannin (1.5 $\mu\text{M}$ ) 2hr recovery       | 77.16 +/- 15.85                                                     | 73.97 +/- 20.36                                                 |
| Arsenite 1mM - Wortmannin (1.5 $\mu\text{M}$ ) 3hr recovery       | 42.89 +/- 20.77                                                     | 66.26 +/- 28.43                                                 |

Details of quantitation methods presented in experimental procedures.

**Table S5. Strains and Plasmids Used in This Study, Related to Experimental Procedures**

| <b>Yeast strains</b> |                                                                                                 |                                |
|----------------------|-------------------------------------------------------------------------------------------------|--------------------------------|
| <b>Name</b>          | <b>Properties</b>                                                                               | <b>Reference</b>               |
| yRP840               | <i>MATa leu2-3,112 trp1 ura3-52 his4-539 cup1::LEU2/PGK1pG/MFA2pG</i>                           | Hatfield et al., 1996          |
| yRP1501              | <i>MATa leu2-3112 lys2-201 trp1 ura3-52 dcp2-7::URA3</i>                                        | Dunckley et al, 2001           |
| yRP2065              | <i>MATa his3Δ0 leu2Δ0 met15Δ0 ura3Δ0 ('BY4741')</i>                                             | Coller and Parker, 2005        |
| yRP2882              | <i>MATa ade2-1 can1-100 his3-11,15 leu2-3,112 trp1-1 ura3-1 bar1D cdc48-3::HIS3</i>             | Hsieh and Chen, 2011 (RHC677)  |
| yRP2883              | <i>MATa ade2-1 can1-100 his3-11,15 leu2-3,112 trp1-1 ura3-1 bar1D ufd1-2</i>                    | Hsieh and Chen, 2011 (RHC1122) |
| yRP2884              | <i>MATa ade2-1 can1-100 his3-11,15 leu2-3,112 trp1-1 ura3-1 bar1D npl4-1</i>                    | Hsieh and Chen, 2011 (RHC1126) |
| yRP2893              | <i>MATa ade2-1 can1-100 his3-11,15 leu2-3,112 trp1-1 ura3-1 bar1D ('W303')</i>                  | Hsieh and Chen, 2011           |
| yRP2894              | <i>MATa his4-619 leu2-3,112 ura3-52 atg15::HYGB</i>                                             | This study                     |
| yRP2896              | <i>MATa leu2-3,112 trp1 ura3-52 his4-539 cup1::LEU2/PGK1pG/MFA2pG atg15::HYGB</i>               | This study                     |
| yRP2897              | <i>MATa his4-539 leu2-3,112 trp1-Δ1 ura3-52 xrn1::URA3 atg15::HYGB</i>                          | This study                     |
| yRP2898              | <i>MATa leu2-3112 lys2-201 trp1 ura3-52 dcp2-7::URA3 atg15::HYGB</i>                            | This study                     |
| yRP2899              | <i>MATa his3Δ0 leu2Δ0 met15Δ0 ura3Δ0 atg15::KANMX</i>                                           | Invitrogen/Resgen collection   |
| yRP2900              | <i>MATa his3Δ0 leu2Δ0 met15Δ0 ura3Δ0 atg8::KANMX atg15::HYGB</i>                                | This study                     |
| yRP2901              | <i>MATa his3Δ0 leu2Δ0 met15Δ0 ura3Δ0 atg11::KANMX atg15::HYGB</i>                               | This study                     |
| yRP2902              | <i>MATa his3Δ0 leu2Δ0 met15Δ0 ura3Δ0 mon1::KANMX atg15::HYGB</i>                                | This study                     |
| yRP2903              | <i>MATa leu2 ura3 his3 met15 VMA2-GFP (HIS)</i>                                                 | Huh et al., 2003               |
| yRP2916              | <i>MATa ade2-1 can1-100 his3-11,15 leu2-3,112 trp1-1 ura3-1 bar1D atg15::HYGB</i>               | This study                     |
| yRP2917              | <i>MATa ade2-1 can1-100 his3-11,15 leu2-3,112 trp1-1 ura3-1 bar1D cdc48-3::HIS3 atg15::HYGB</i> | This study                     |
|                      |                                                                                                 |                                |
| <b>Plasmids</b>      |                                                                                                 |                                |
| <b>Name</b>          | <b>Properties</b>                                                                               | <b>Reference</b>               |
| pRP1574              | Edc3-mCh; Cen; URA3 marker                                                                      | Buchan et al, 2008             |
| pRP1657              | Pab1-GFP, Edc3-mCh; Cen; URA3 marker                                                            | Buchan et al, 2008             |
| pRP1659              | Pab1-GFP, Edc3-mCh; Cen; TRP1 marker                                                            | Buchan et al, 2008             |
| pRP1661              | Pub1-mCh; Cen; URA3 marker                                                                      | Buchan et al, 2008             |
| pRP2150              | Pub1-mCh; Cen; LEU2 marker                                                                      | Buchan et al, 2010             |
| pRP1944              | Edc3-mCh; Pbp1-GFP; Cen; TRP1 marker                                                            | Swisher and Parker, 2010       |
| pRP2447              | GFP-Atg19 (truncated ORF); Cen; URA3 marker                                                     | Shintani et al, 2002           |
|                      |                                                                                                 |                                |
